# Supplementary material for: A colorimetric and ratiometric fluorescent probe for Cu2+ with a large red shift and its imaging in living cells
Source: Royal Society of Chemistry journal article supplement (doi:10.1039/c3ra23057k), 2013-01-01
Supplement: c3ra23057k.pdf [file c3ra23057k.pdf]

**Electronic supplementary information (ESI)**

**A Colorimetric and Ratiometric Fluorescent Probe for Copper(II)  
with Large Red Shift and Its Ratiometric Imaging in Living Cells**

**Song Chen<sup>1,2</sup>, Peng Hou<sup>1,2</sup>, Jame W. Foley<sup>3</sup>, and Xiangzhi Song<sup>1,2,4\*</sup>**

*1. College of Chemistry & Chemical Engineering; 2. Key Laboratory of Resource  
Chemistry of Nonferrous Metals, Ministry of Education; 4. State Key Laboratory  
for Powder Metallurgy at Central South University*

*932 Lushan South Road, Changsha, Hunan Province, P. R. China, 410083*

*3. Rowland Institute at Harvard, Harvard University*

*100 Edwin H. Land Blvd. Cambridge, MA, USA 02142*

*Corresponding author: X. S., Telephone: +86-731-88836954,*

*Fax: +86-731-88836954, Email: xzsong@csu.edu.cn*

### ***Table of contents***

- 1. Time-dependent fluorescent behavior of probe 1 at different equiv of Cu<sup>2+</sup> in 50% H<sub>2</sub>O-CH<sub>3</sub>CN HEPES buffered solution**
- 2. Fluorescence spectra of probe 1 upon the addition of various metal ions in H<sub>2</sub>O-Ethanol HEPES buffered solution(50%, V/V)**
- 3. Fluorescence spectra of probe 1 upon the addition of various metal ions in H<sub>2</sub>O-DMSO HEPES buffered solution(50%, V/V)**
- 4. Fluorescence spectra of probe 1 upon the addition of various metal ions in H<sub>2</sub>O-CH<sub>3</sub>CN HEPES buffered solution (70%, V/V)**
- 5. Fluorescence spectra of probe 1 upon the addition of various metal ions in H<sub>2</sub>O-CH<sub>3</sub>CN HEPES buffered solution (90%, V/V)**
- 6. pH Effect on the ratio of fluorescence intensity of probe 1 in the presence and absence of Cu<sup>2+</sup>**
- 7. <sup>1</sup>H NMR spectrum of probe 1 in CDCl<sub>3</sub>**
- 8. Mass (ESI) spectrum of probe 1 (M+1)**
- 9. Mass (ESI) spectrum of the reaction products of probe 1 with Cu<sup>2+</sup>**

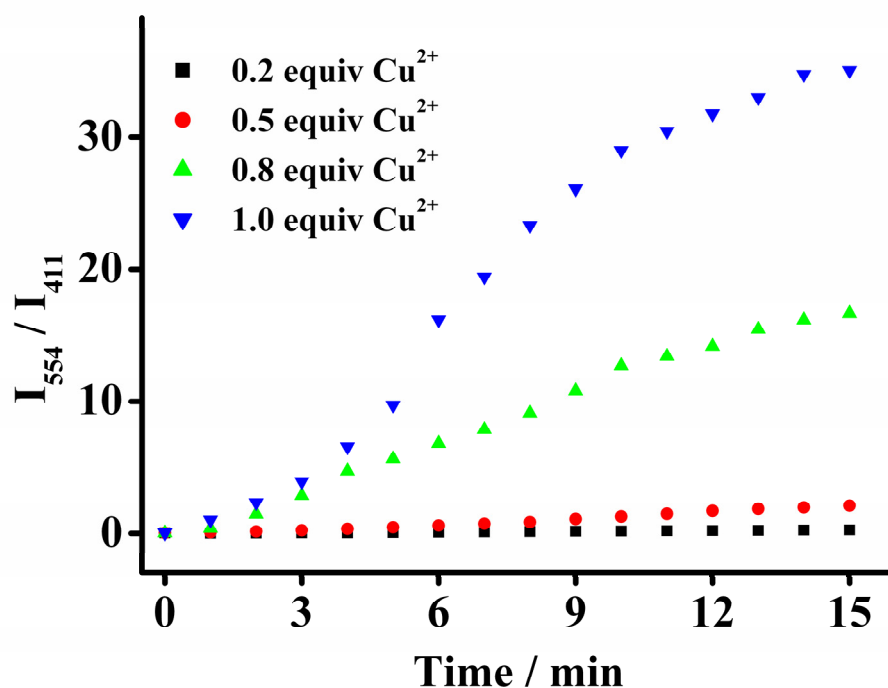

**Fig. S1** Time-dependent fluorescent behavior of probe 1 with different equiv. of  $\text{Cu}^{2+}$  in  $\text{H}_2\text{O}-\text{CH}_3\text{CN}$  HEPES buffer (pH 7.4, 25 mM) (50%, V/V).

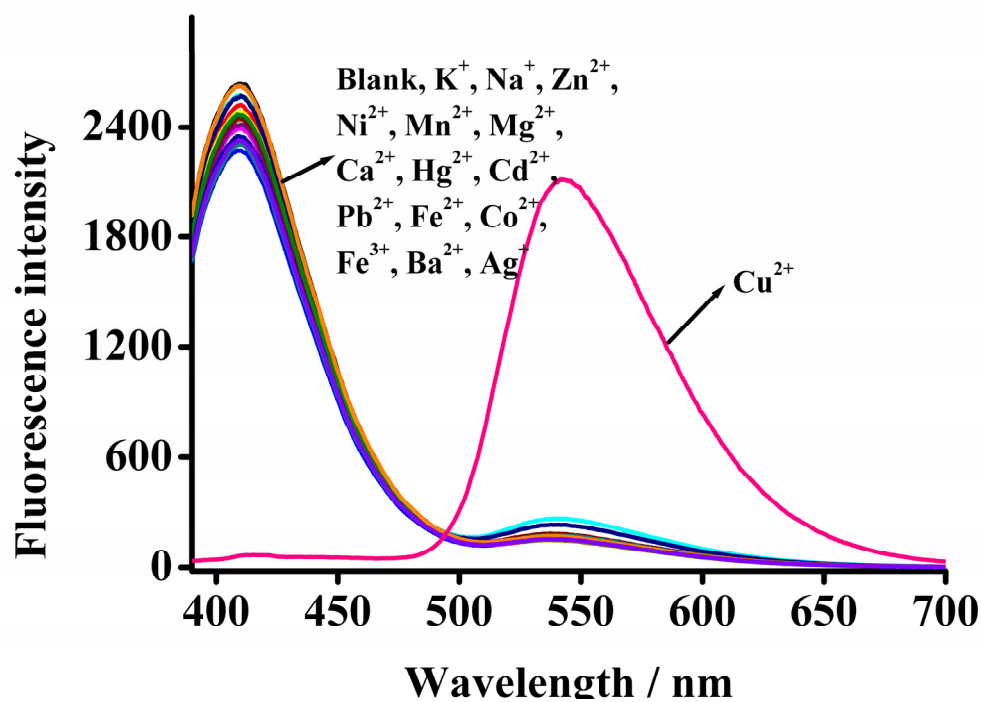

**Fig. S2** Fluorescence spectra of the probe 1 (10  $\mu\text{M}$ ,  $\lambda_{\text{ex}} = 376 \text{ nm}$ ) upon the addition of various metal ions (15  $\mu\text{M}$ ) in HEPES buffered (pH 7.4, 25 mM)  $\text{H}_2\text{O}$ -Ethanol (50%, V/V).

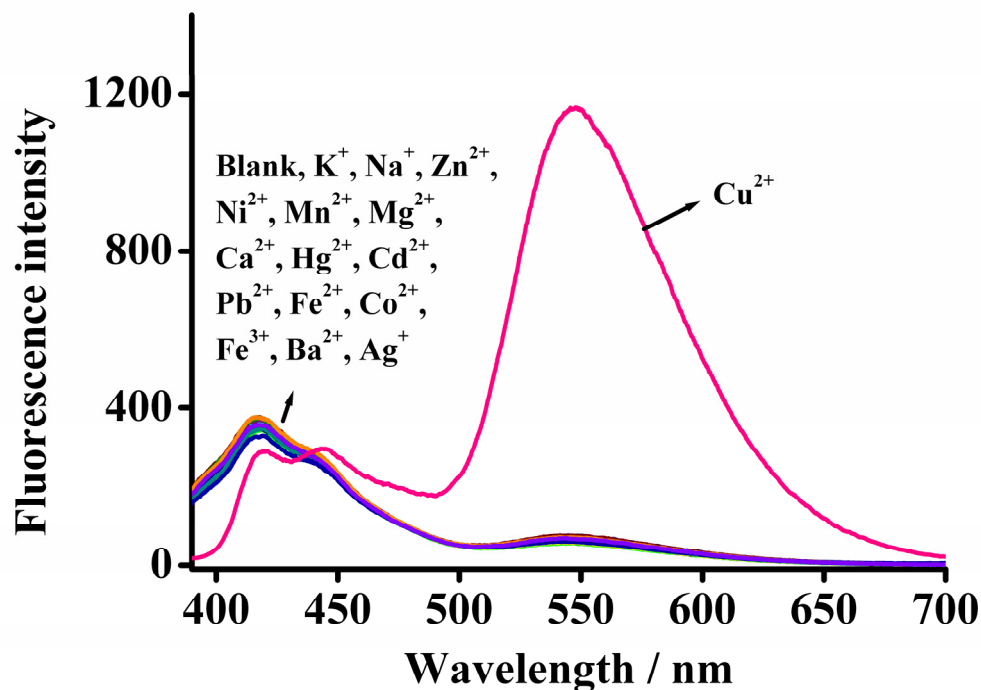

**Fig. S3** Fluorescence spectra of the probe **1** ( $10 \mu\text{M}$ ,  $\lambda_{\text{ex}} = 375 \text{ nm}$ ) upon the addition of various metal ions ( $15 \mu\text{M}$ ) in HEPES buffered (pH 7.4, 25 mM)  $\text{H}_2\text{O}$ -DMSO (50%, V/V).

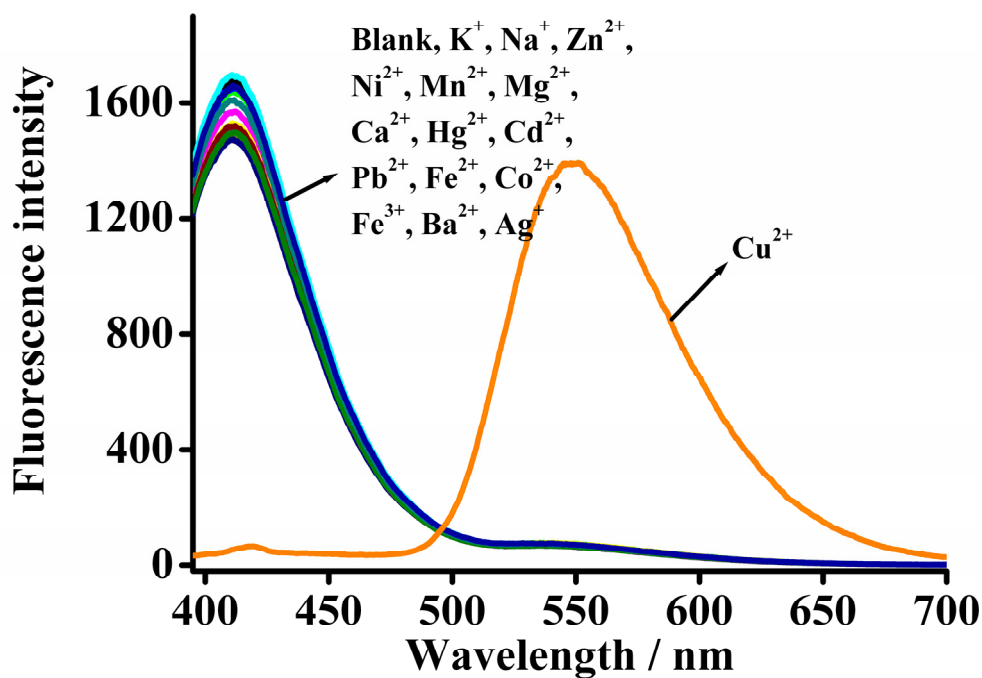

**Fig. S4** Fluorescence spectra of the probe **1** ( $10 \mu\text{M}$ ,  $\lambda_{\text{ex}} = 371 \text{ nm}$ ) upon the addition of various metal ions ( $15 \mu\text{M}$ ) in HEPES buffered (pH 7.4, 25 mM)  $\text{H}_2\text{O}$ - $\text{CH}_3\text{CN}$  (70%, V/V).

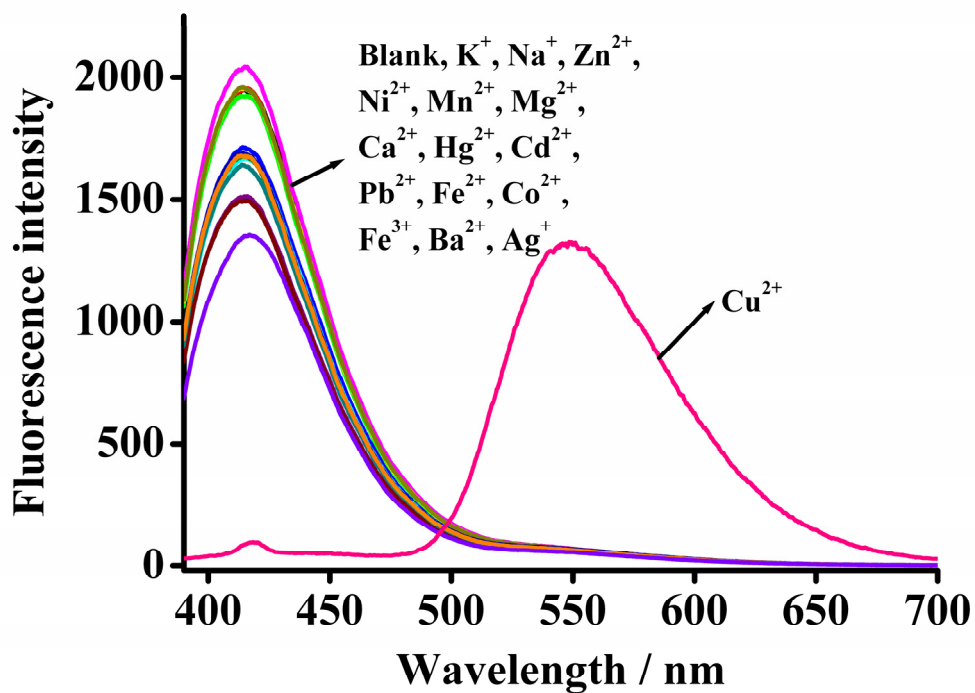

**Fig. S5** Fluorescence spectra of the probe 1 (10  $\mu\text{M}$ ,  $\lambda_{\text{ex}} = 376 \text{ nm}$ ) upon the addition of various metal ions (15  $\mu\text{M}$ ) in HEPES buffered (pH 7.4, 25 mM)  $\text{H}_2\text{O}-\text{CH}_3\text{CN}$  (90%, V/V).

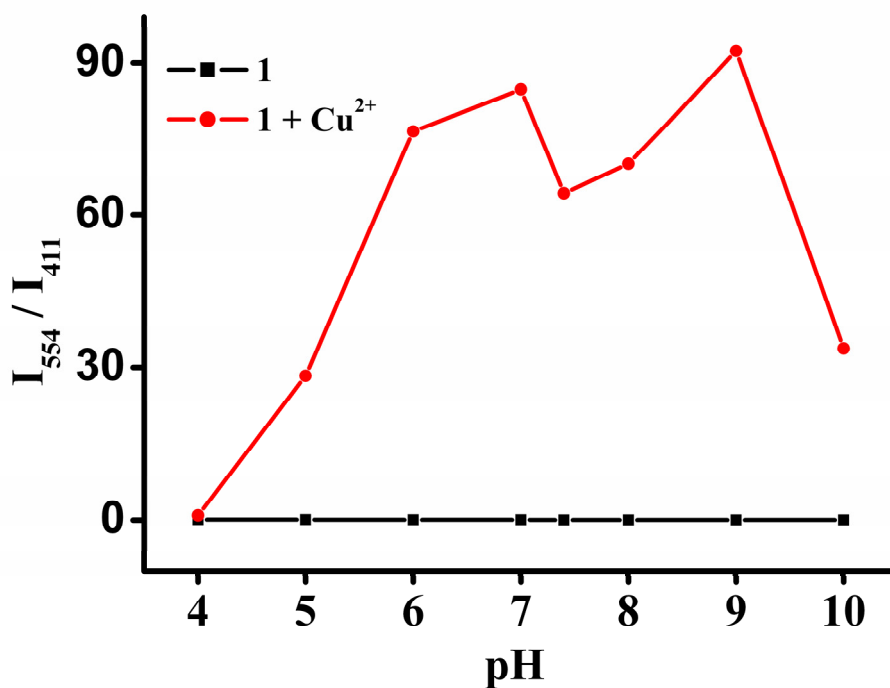

**Fig.S6** The ratio of fluorescence intensity of the probe 1 at 554 nm and 411nm in the presence of absence of  $\text{Cu}^{2+}$  at different pH conditions.

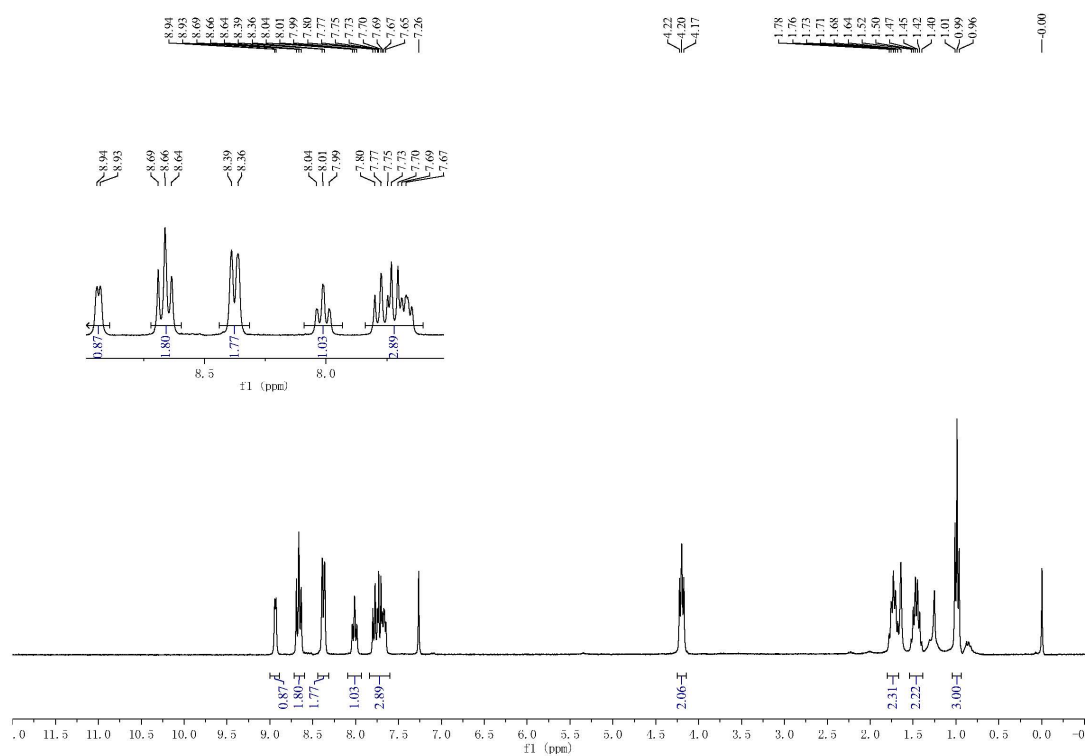

**Fig. S7**  $^1\text{H}$  NMR spectrum of probe 1 in  $\text{CDCl}_3$

### Generic Display Report

|                      |                                            |                  |                    |
|----------------------|--------------------------------------------|------------------|--------------------|
| <b>Analysis Info</b> |                                            | Acquisition Date | 7/16/2012 10:39:28 |
| Analysis Name        | D:\Data\YANGY_MS\New\LIZHANGMING120716_1.d | Operator         | ESQ6K              |
| Method               | APCIMS.m                                   | Instrument       | esquire6000        |
| Sample Name          | M=374                                      |                  |                    |
| Comment              |                                            |                  |                    |

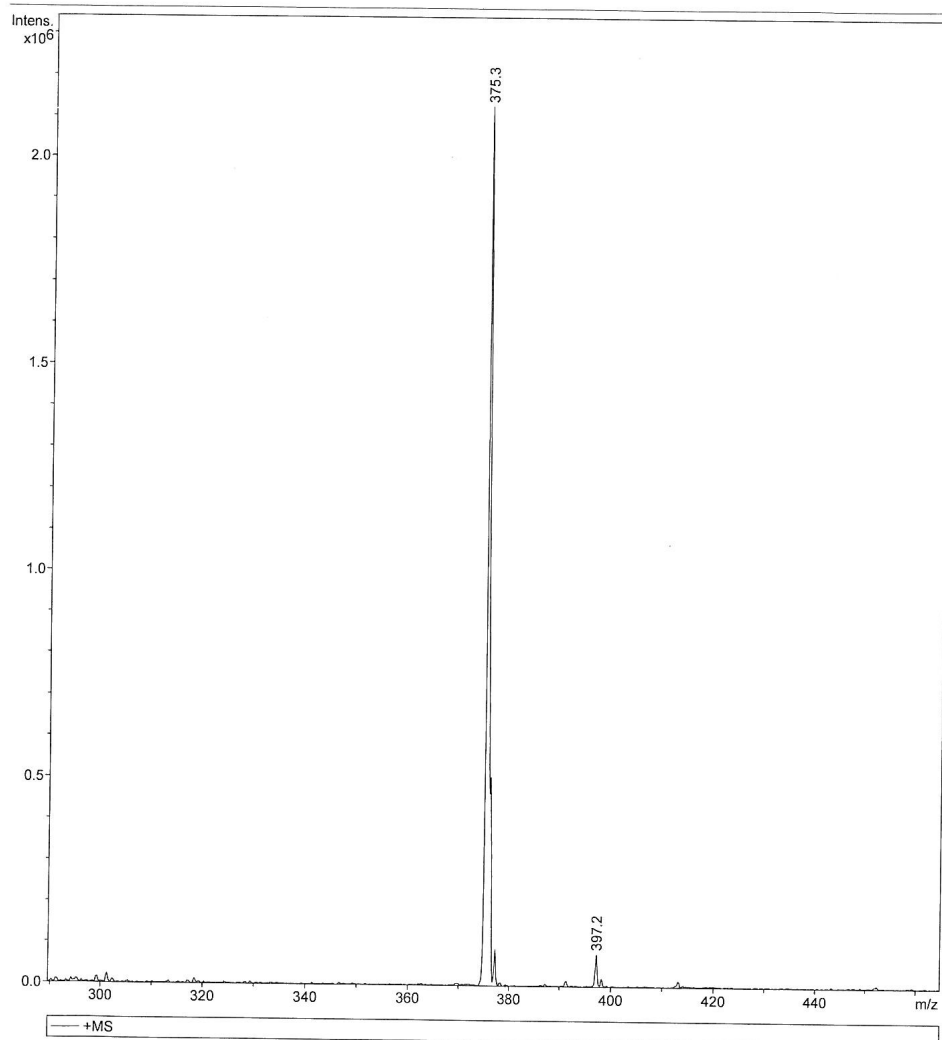

**Fig. S8** Mass (ESI) spectrum of probe 1 (M+1).

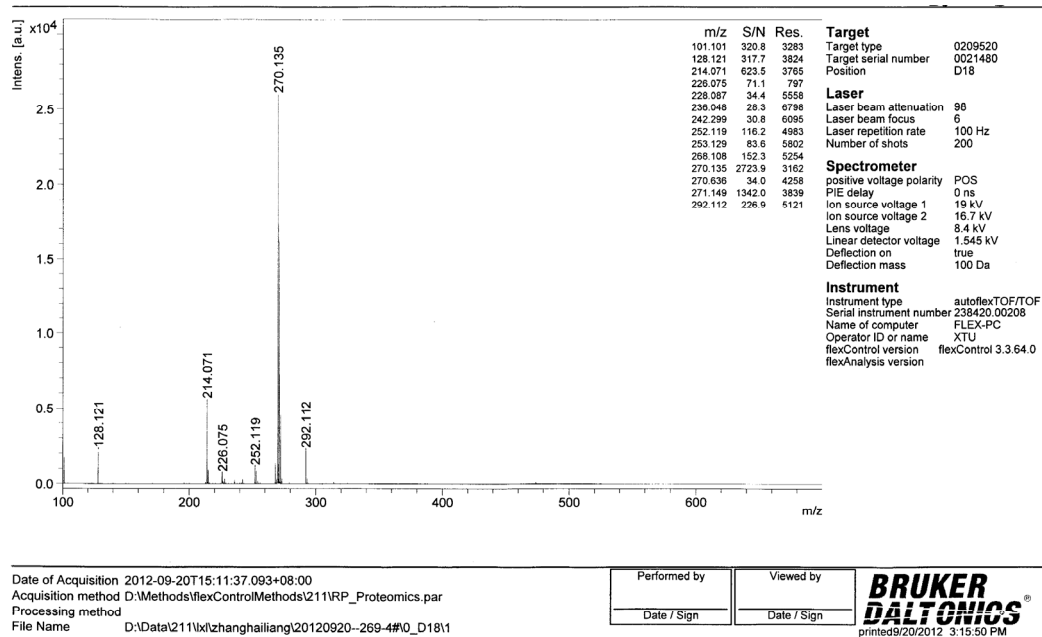

**Fig. S9** Mass (ESI) spectrum of the reaction products of probe **1** with  $\text{Cu}^{2+}$ .
